# Supplementary material for: Evolution of codon usage in Zika virus genomes is host and vector specific
Source: PubMed Central journal article supplement (PMC5117728; doi:10.1038/emi.2016.106), 2016-10-12
Supplement: emi2016106x2.pdf [file emi2016106x2.pdf]

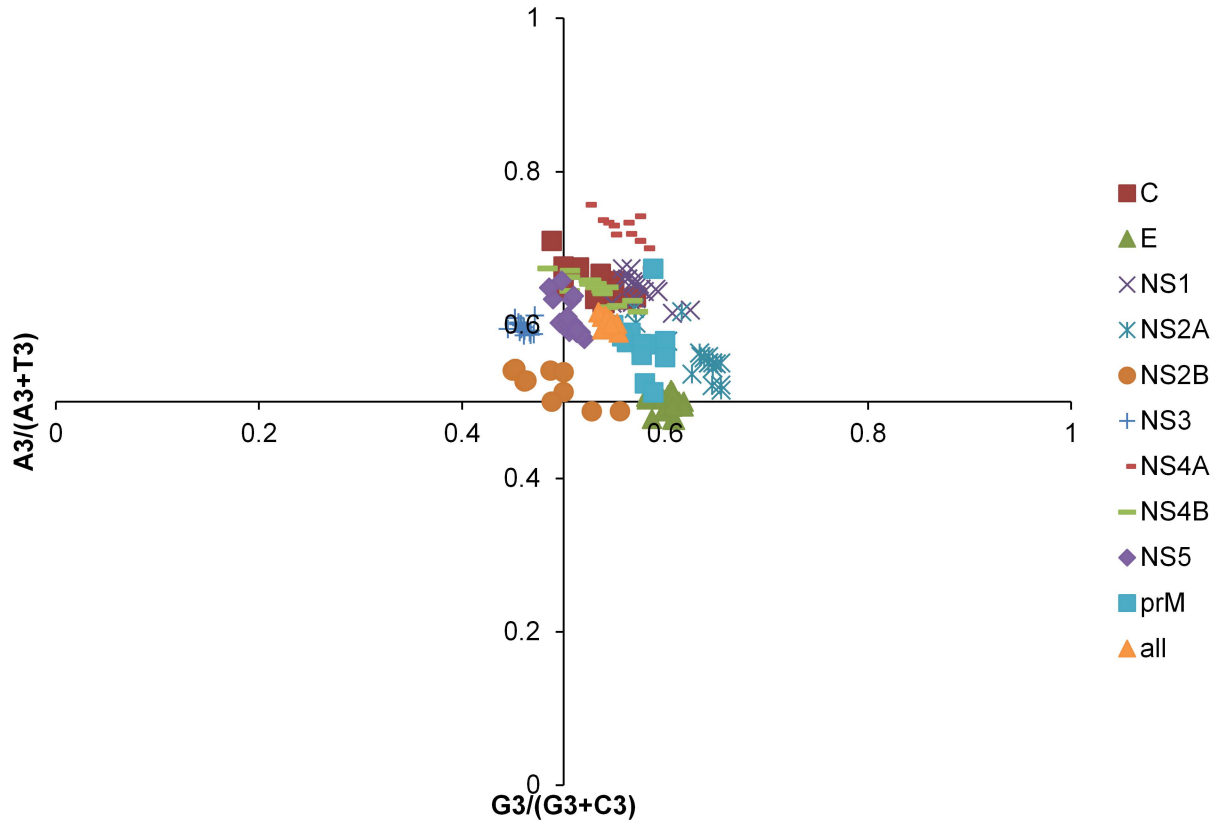

**Supplementary Figure S2. Parity rule 2 (PR2) bias plots.**

PR2 plots were constructed for whole genome and individual ZIKV coding sequences, indicated as “All” and one letter gene codes respectively. (A) Whole genome. (B) *C*. (C) *prM*. (D) *E*. (E) *NS1*. (F) *NS2A*. (G) *NS2B*. (H) *NS3*. (I) *NS4A*. (J) *NS4B*. (K) *NS5*.
