# Supplementary material for: Evolution of codon usage in Zika virus genomes is host and vector specific
Source: PubMed Central journal article supplement (PMC5117728; doi:10.1038/emi.2016.106), 2016-10-12
Supplement: emi2016106x4.pdf [file emi2016106x4.pdf]

**Supplementary Table S1:** Demographics of ZIKV genomes analyzed in present study.

| S. No | GenBank Accession | Year | Host                       | Country                  | Genotype <sup>1</sup> |              |
|-------|-------------------|------|----------------------------|--------------------------|-----------------------|--------------|
| 1     | KF268948          | 1976 | <i>Aedes africanus</i>     | Central African Republic | East African          |              |
| 2     | EU545988          | 2007 | <i>Homo sapiens</i>        | Micronesia               | Asian                 |              |
| 3     | KU681082          | 2012 | <i>Homo sapiens</i>        | Philippines              | Asian                 |              |
| 4     | KJ776791          | 2013 | <i>Homo sapiens</i>        | French Polynesia         | Asian                 |              |
| 5     | KU681081          | 2014 | <i>Homo sapiens</i>        | Thailand                 | Asian                 |              |
| 6     | KU509998          | 2014 | <i>Homo sapiens</i>        | Haiti                    | Asian                 |              |
| 7     | KU365779          | 2015 | <i>Homo sapiens</i>        | Brazil                   | Asian                 |              |
| 8     | KU497555          | 2015 | <i>Homo sapiens</i>        | Brazil                   | Asian                 |              |
| 9     | KU647676          | 2015 | <i>Homo sapiens</i>        | Martinique               | Asian                 |              |
| 10    | KU527068          | 2015 | <i>Homo sapiens</i>        | Brazil                   | Asian                 |              |
| 11    | KU707826          | 2015 | <i>Homo sapiens</i>        | Brazil                   | Asian                 |              |
| 12    | KU501215          | 2015 | <i>Homo sapiens</i>        | Puerto Rico              | Asian                 |              |
| 13    | KU501216          | 2015 | <i>Homo sapiens</i>        | Guatemala                | Asian                 |              |
| 14    | KU501217          | 2015 | <i>Homo sapiens</i>        | Guatemala                | Asian                 |              |
| 15    | KU365780          | 2015 | <i>Homo sapiens</i>        | Brazil                   | Asian                 |              |
| 16    | KU365778          | 2015 | <i>Homo sapiens</i>        | Brazil                   | Asian                 |              |
| 17    | KU312312          | 2015 | <i>Homo sapiens</i>        | Suriname                 | Asian                 |              |
| 18    | KU365777          | 2015 | <i>Homo sapiens</i>        | Brazil                   | Asian                 |              |
| 19    | KU321639          | 2015 | <i>Homo sapiens</i>        | Brazil                   | Asian                 |              |
| 20    | AY632535          | 1947 | <i>Sentinel monkey</i>     | Uganda                   | East African          |              |
| 21    | KF268949          | 1980 | <i>Aedes opok</i>          | Central African Republic | East African          |              |
| 22    | KF268950          | 1976 | <i>Aedes africanus</i>     | Central African Republic | East African          |              |
| 23    | HQ234501          | 1984 | <i>Aedes africanus</i>     | Senegal                  | West African          |              |
| 24    | HQ234500          | 1968 | <i>Homo sapiens</i>        | Nigeria                  | West African          |              |
| 25    | KF993678          | 2013 | <i>Homo sapiens</i>        | Canada                   | Asian                 |              |
| 26    | HQ234499          | 1966 | <i>Aedes Aegypti</i>       | Malaysia                 | Asian                 |              |
| 27    | JN860885          | 2010 | <i>Homo sapiens</i>        | Cambodia                 | Asian                 |              |
| 28    | KF383116          | 1968 | <i>Aedes luteocephalus</i> | Senegal                  | East African          | Recombinants |
| 29    | KF383117          | 1997 | <i>Aedes luteocephalus</i> | Senegal                  | East African          | Recombinants |
| 30    | KF383118          | 2001 | <i>Aedes africanus</i>     | Senegal                  | East African          | Recombinants |
| 31    | KF383119          | 2001 | <i>Aedes africanus</i>     | Senegal                  | East African          | Recombinants |

<sup>1</sup>; inferred from the phylogenetic analysis (Supplementary Figure S1)
