# Supplementary material for: Evolution of codon usage in Zika virus genomes is host and vector specific
Source: PubMed Central journal article supplement (PMC5117728; doi:10.1038/emi.2016.106), 2016-10-12
Supplement: emi2016106x5.pdf [file emi2016106x5.pdf]

**Supplementary Table S2: Nucleotide composition analysis of ZIKV coding sequences (%).**

| No  | A     | U     | G     | C     | A <sub>3</sub> | U <sub>3</sub> | G <sub>3</sub> | C <sub>3</sub> | AU    | GC    | GC <sub>1</sub> | GC <sub>2</sub> | AU <sub>3</sub> | GC <sub>3</sub> | GC <sub>12</sub> | ENC   |
|-----|-------|-------|-------|-------|----------------|----------------|----------------|----------------|-------|-------|-----------------|-----------------|-----------------|-----------------|------------------|-------|
| 1   | 27.10 | 22.66 | 28.82 | 21.42 | 26.20          | 20.76          | 29.05          | 23.99          | 49.76 | 50.24 | 53.04           | 44.65           | 46.96           | 53.04           | 48.84            | 54.03 |
| 2   | 26.52 | 22.12 | 29.39 | 21.97 | 24.40          | 19.57          | 30.89          | 25.15          | 48.64 | 51.36 | 53.05           | 44.99           | 43.96           | 56.04           | 49.02            | 54.28 |
| 3   | 26.76 | 22.00 | 29.22 | 22.02 | 25.13          | 19.23          | 30.43          | 25.21          | 48.76 | 51.24 | 53.04           | 45.05           | 44.36           | 55.64           | 49.05            | 54.04 |
| 4   | 26.67 | 22.04 | 29.28 | 22.00 | 24.84          | 19.28          | 30.64          | 25.24          | 48.72 | 51.28 | 52.94           | 45.03           | 44.12           | 55.88           | 48.98            | 53.75 |
| 5   | 26.70 | 22.03 | 29.20 | 22.07 | 25.06          | 19.30          | 30.34          | 25.30          | 48.73 | 51.27 | 53.12           | 45.05           | 44.36           | 55.64           | 49.08            | 54.14 |
| 6   | 26.66 | 22.04 | 29.28 | 22.01 | 24.82          | 19.29          | 30.62          | 25.27          | 48.71 | 51.29 | 52.96           | 45.03           | 44.11           | 55.89           | 48.99            | 53.60 |
| 7   | 26.70 | 22.04 | 29.25 | 22.02 | 24.92          | 19.27          | 30.52          | 25.29          | 48.74 | 51.26 | 52.95           | 45.03           | 44.19           | 55.81           | 48.99            | 53.64 |
| 8   | 26.70 | 21.99 | 29.24 | 22.07 | 24.93          | 19.04          | 30.52          | 25.51          | 48.69 | 51.31 | 52.88           | 45.03           | 43.97           | 56.03           | 48.95            | 53.52 |
| 9   | 26.74 | 22.02 | 29.23 | 22.01 | 25.07          | 19.21          | 30.46          | 25.27          | 48.77 | 51.23 | 52.91           | 45.07           | 44.28           | 55.72           | 48.99            | 53.50 |
| 10  | 26.69 | 22.06 | 29.25 | 22.00 | 24.99          | 19.23          | 30.46          | 25.32          | 48.75 | 51.25 | 52.99           | 44.99           | 44.22           | 55.78           | 48.99            | 53.63 |
| 11  | 26.70 | 22.04 | 29.25 | 22.02 | 24.92          | 19.27          | 30.52          | 25.29          | 48.74 | 51.26 | 52.95           | 45.03           | 44.19           | 55.81           | 48.99            | 53.64 |
| 12  | 26.72 | 21.92 | 29.25 | 22.12 | 24.98          | 18.98          | 30.52          | 25.53          | 48.64 | 51.36 | 52.95           | 45.10           | 43.95           | 56.05           | 49.02            | 53.82 |
| 13  | 26.73 | 22.09 | 29.19 | 21.99 | 25.03          | 19.33          | 30.39          | 25.25          | 48.82 | 51.18 | 52.85           | 45.04           | 44.36           | 55.64           | 48.95            | 53.95 |
| 14  | 26.73 | 22.08 | 29.19 | 22.00 | 25.03          | 19.29          | 30.39          | 25.29          | 48.81 | 51.19 | 52.85           | 45.04           | 44.32           | 55.68           | 48.95            | 53.89 |
| 15  | 26.69 | 22.05 | 29.25 | 22.00 | 24.92          | 19.31          | 30.52          | 25.25          | 48.75 | 51.25 | 52.96           | 45.03           | 44.22           | 55.78           | 48.99            | 53.64 |
| 16  | 26.74 | 22.01 | 29.21 | 22.04 | 25.04          | 19.20          | 30.40          | 25.37          | 48.75 | 51.25 | 52.96           | 45.03           | 44.23           | 55.77           | 48.99            | 53.85 |
| 17  | 26.68 | 21.99 | 29.27 | 22.07 | 24.87          | 19.14          | 30.57          | 25.42          | 48.66 | 51.34 | 52.94           | 45.09           | 44.01           | 55.99           | 49.01            | 53.64 |
| 18  | 26.69 | 22.05 | 29.25 | 22.01 | 24.92          | 19.29          | 30.52          | 25.27          | 48.74 | 51.26 | 52.96           | 45.03           | 44.21           | 55.79           | 48.99            | 53.64 |
| 19  | 26.65 | 22.04 | 29.30 | 22.01 | 24.75          | 19.29          | 30.69          | 25.27          | 48.69 | 51.31 | 52.94           | 45.03           | 44.04           | 55.96           | 48.98            | 53.55 |
| 20  | 27.05 | 22.12 | 29.01 | 21.82 | 25.93          | 19.47          | 29.66          | 24.94          | 49.17 | 50.83 | 53.23           | 44.66           | 45.40           | 54.60           | 48.95            | 54.71 |
| 21  | 27.20 | 22.60 | 28.77 | 21.42 | 26.56          | 20.81          | 28.90          | 23.72          | 49.80 | 50.20 | 53.19           | 44.78           | 47.38           | 52.62           | 48.98            | 54.29 |
| 22  | 27.10 | 22.67 | 28.81 | 21.42 | 26.20          | 20.81          | 29.00          | 23.99          | 49.77 | 50.23 | 53.04           | 44.65           | 47.00           | 53.00           | 48.84            | 54.23 |
| 23  | 26.75 | 22.00 | 29.25 | 21.99 | 25.41          | 19.06          | 30.20          | 25.33          | 48.79 | 51.24 | 53.30           | 44.90           | 44.47           | 55.53           | 49.10            | 54.28 |
| 24  | 26.90 | 22.16 | 29.24 | 21.70 | 25.63          | 19.54          | 30.22          | 24.61          | 49.02 | 50.95 | 53.26           | 44.74           | 45.17           | 54.83           | 49.00            | 54.10 |
| 25  | 26.69 | 21.93 | 29.27 | 22.10 | 24.68          | 19.05          | 30.91          | 25.37          | 48.63 | 51.37 | 52.92           | 44.92           | 43.73           | 56.27           | 48.92            | 53.32 |
| 26  | 26.53 | 22.10 | 29.35 | 22.02 | 24.62          | 19.48          | 30.63          | 25.27          | 48.62 | 51.38 | 53.19           | 45.05           | 44.10           | 55.90           | 49.12            | 54.90 |
| 27  | 26.66 | 22.15 | 29.27 | 21.92 | 24.74          | 19.81          | 30.65          | 24.80          | 48.81 | 51.19 | 53.08           | 45.04           | 44.55           | 55.45           | 49.06            | 54.43 |
| Avg | 26.76 | 22.11 | 29.20 | 21.94 | 25.13          | 19.46          | 30.32          | 25.09          | 48.87 | 51.13 | 53.02           | 44.96           | 44.59           | 55.41           | 48.99            | 53.93 |
| SD  | 0.17  | 0.20  | 0.16  | 0.20  | 0.52           | 0.51           | 0.53           | 0.47           | 0.35  | 0.35  | 0.12            | 0.14            | 0.97            | 0.97            | 0.06             | 0.39  |

*ENC* effective number of codons; *Avg* average; *SD* standard deviation. The numbering of ZIKV strains in first column corresponds to that of Supplementary Table S1.
