# Supplementary material for: Evolution of codon usage in Zika virus genomes is host and vector specific
Source: PubMed Central journal article supplement (PMC5117728; doi:10.1038/emi.2016.106), 2016-10-12
Supplement: emi2016106x6.pdf [file emi2016106x6.pdf]

**Supplementary Table S3. Summary of correlation between the first two principle axes and nucleotide constraints in ZIKV (average of all genes)**

| <b>Base composition</b> | <b>f<sub>1</sub> (Axis 1)</b> | <b>f<sub>2</sub> (Axis 2)</b> |
|-------------------------|-------------------------------|-------------------------------|
| A                       | 0.449*                        | -0.029 <sup>NS</sup>          |
| T                       | 0.436*                        | 0.134 <sup>NS</sup>           |
| G                       | -0.224 <sup>NS</sup>          | -0.057 <sup>NS</sup>          |
| C                       | -0.526**                      | 0.075 <sup>NS</sup>           |
| A <sub>3</sub>          | 0.441*                        | -0.004 <sup>NS</sup>          |
| T <sub>3</sub>          | 0.491**                       | 0.093 <sup>NS</sup>           |
| G <sub>3</sub>          | -0.438*                       | -0.026 <sup>NS</sup>          |
| C <sub>3</sub>          | -0.545**                      | 0.025 <sup>NS</sup>           |
| AU                      | 0.425*                        | 0.055 <sup>NS</sup>           |
| GC                      | -0.420*                       | -0.061 <sup>NS</sup>          |
| AU <sub>3</sub>         | 0.552**                       | 0.109 <sup>NS</sup>           |
| GC <sub>3</sub>         | -0.552**                      | -0.109 <sup>NS</sup>          |

NS means non-significant ( $P > 0.05$ ).

\* represents  $P < 0.05$ .

\*\* represents  $P < 0.01$ .
