# Supplementary material for: Evolution of codon usage in Zika virus genomes is host and vector specific
Source: PubMed Central journal article supplement (PMC5117728; doi:10.1038/emi.2016.106), 2016-10-12
Supplement: emi2016106x8.pdf [file emi2016106x8.pdf]

Supplementary Table S5. Summary of relative codon deoptimization index (RCDI) analysis.

| ZIKV Coding Sequences    | C     |      |      | E    |      |      | NS1  |      |      | NS2A |      |      | NS2B |      |      |               |      |      |      |
|--------------------------|-------|------|------|------|------|------|------|------|------|------|------|------|------|------|------|---------------|------|------|------|
| ZIKV Strains             | HS    | AG   | AB   | HS   | AG   | AB   | HS   | AG   | AB   | HS   | AG   | AB   | HS   | AG   | AB   |               |      |      |      |
| KF268948 ARB13565        | EA    | 1.35 | 1.37 | 1.47 | 1.21 | 1.26 | 1.35 | 1.20 | 1.39 | 1.52 | 1.21 | 1.24 | 1.33 | 1.33 | 1.43 | 1.55          |      |      |      |
| EU545988 FSM             | Asian | 1.22 | 1.35 | 1.42 | 1.19 | 1.24 | 1.37 | 1.21 | 1.41 | 1.53 | 1.18 | 1.18 | 1.23 | 1.49 | 1.50 | 1.53          |      |      |      |
| KU681082 CPC-0740        | Asian | 1.22 | 1.32 | 1.40 | 1.18 | 1.25 | 1.37 | 1.22 | 1.43 | 1.54 | 1.18 | 1.17 | 1.24 | 1.46 | 1.47 | 1.52          |      |      |      |
| KJ776791 H PF/2013       | Asian | 1.20 | 1.27 | 1.35 | 1.19 | 1.24 | 1.36 | 1.20 | 1.39 | 1.51 | 1.21 | 1.16 | 1.21 | 1.40 | 1.44 | 1.45          |      |      |      |
| KU681081 SV0127/14       | Asian | 1.22 | 1.27 | 1.36 | 1.20 | 1.24 | 1.37 | 1.21 | 1.39 | 1.51 | 1.20 | 1.19 | 1.25 | 1.38 | 1.44 | 1.48          |      |      |      |
| KU509998 Haiti/1225/2014 | Asian | 1.22 | 1.29 | 1.38 | 1.20 | 1.25 | 1.37 | 1.20 | 1.39 | 1.50 | 1.19 | 1.18 | 1.24 | 1.40 | 1.44 | 1.45          |      |      |      |
| KU365779 BeH819966       | Asian | 1.20 | 1.27 | 1.35 | 1.20 | 1.25 | 1.38 | 1.20 | 1.39 | 1.50 | 1.20 | 1.17 | 1.23 | 1.40 | 1.44 | 1.45          |      |      |      |
| KU497555 Brazil-ZKV2015  | Asian | 1.20 | 1.27 | 1.34 | 1.20 | 1.26 | 1.39 | 1.20 | 1.39 | 1.51 | 1.20 | 1.18 | 1.23 | 1.39 | 1.43 | 1.44          |      |      |      |
| KU647676 MRS OPY         | Asian | 1.19 | 1.26 | 1.34 | 1.20 | 1.25 | 1.38 | 1.20 | 1.40 | 1.52 | 1.21 | 1.19 | 1.25 | 1.41 | 1.45 | 1.47          |      |      |      |
| KU527068 Natal RGN       | Asian | 1.22 | 1.29 | 1.38 | 1.20 | 1.25 | 1.37 | 1.19 | 1.39 | 1.50 | 1.20 | 1.18 | 1.24 | 1.40 | 1.44 | 1.45          |      |      |      |
| KU707826 SSABR1          | Asian | 1.20 | 1.27 | 1.35 | 1.20 | 1.25 | 1.38 | 1.20 | 1.39 | 1.50 | 1.20 | 1.17 | 1.23 | 1.40 | 1.44 | 1.45          |      |      |      |
| KU501215 PRVABC59        | Asian | 1.19 | 1.27 | 1.36 | 1.20 | 1.25 | 1.38 | 1.20 | 1.39 | 1.51 | 1.21 | 1.18 | 1.24 | 1.40 | 1.44 | 1.45          |      |      |      |
| KU501216 103344          | Asian | 1.20 | 1.27 | 1.35 | 1.20 | 1.25 | 1.38 | 1.20 | 1.39 | 1.51 | 1.19 | 1.16 | 1.22 | 1.40 | 1.44 | 1.45          |      |      |      |
| KU501217 8375            | Asian | 1.20 | 1.27 | 1.35 | 1.20 | 1.25 | 1.38 | 1.20 | 1.39 | 1.51 | 1.19 | 1.16 | 1.22 | 1.40 | 1.44 | 1.45          |      |      |      |
| KU365780 BeH815744       | Asian | 1.20 | 1.27 | 1.35 | 1.20 | 1.25 | 1.38 | 1.20 | 1.39 | 1.50 | 1.20 | 1.17 | 1.23 | 1.40 | 1.44 | 1.45          |      |      |      |
| KU365778 BeH819015       | Asian | 1.21 | 1.27 | 1.36 | 1.19 | 1.26 | 1.38 | 1.20 | 1.39 | 1.50 | 1.20 | 1.18 | 1.24 | 1.39 | 1.43 | 1.45          |      |      |      |
| KU312312 Z1106033        | Asian | 1.20 | 1.27 | 1.35 | 1.19 | 1.26 | 1.39 | 1.19 | 1.37 | 1.49 | 1.20 | 1.17 | 1.23 | 1.40 | 1.44 | 1.45          |      |      |      |
| KU365777 BeH818995       | Asian | 1.20 | 1.27 | 1.34 | 1.20 | 1.25 | 1.38 | 1.20 | 1.39 | 1.50 | 1.20 | 1.17 | 1.23 | 1.40 | 1.44 | 1.45          |      |      |      |
| KU321639 ZikaSPH2015     | Asian | 1.22 | 1.30 | 1.39 | 1.19 | 1.25 | 1.37 | 1.20 | 1.39 | 1.50 | 1.19 | 1.18 | 1.24 | 1.40 | 1.44 | 1.45          |      |      |      |
| AY632535 MR 766          | EA    | 1.30 | 1.34 | 1.45 | 1.16 | 1.21 | 1.29 | 1.20 | 1.37 | 1.52 | 1.24 | 1.24 | 1.34 | 1.30 | 1.38 | 1.49          |      |      |      |
| KF268949 ARB15076        | EA    | 1.38 | 1.41 | 1.53 | 1.21 | 1.26 | 1.36 | 1.20 | 1.37 | 1.52 | 1.18 | 1.18 | 1.28 | 1.33 | 1.46 | 1.56          |      |      |      |
| KF268950 ARB7701         | EA    | 1.35 | 1.37 | 1.47 | 1.21 | 1.26 | 1.35 | 1.20 | 1.39 | 1.52 | 1.21 | 1.24 | 1.33 | 1.33 | 1.43 | 1.55          |      |      |      |
| HQ234501 ArD 41519       | WA    | 1.31 | 1.35 | 1.41 | 1.23 | 1.29 | 1.39 | 1.22 | 1.39 | 1.48 | 1.14 | 1.16 | 1.24 | 1.37 | 1.45 | 1.55          |      |      |      |
| HQ234500 IbH 30656       | WA    | 1.37 | 1.38 | 1.44 | 1.23 | 1.27 | 1.38 | 1.18 | 1.36 | 1.46 | 1.18 | 1.19 | 1.28 | 1.40 | 1.50 | 1.61          |      |      |      |
| KF993678 PLCal ZV        | Asian | 1.40 | 1.58 | 1.67 | 1.19 | 1.23 | 1.36 | 1.21 | 1.39 | 1.51 | 1.20 | 1.20 | 1.26 | 1.44 | 1.46 | 1.50          |      |      |      |
| HQ234499 P6-740          | Asian | 1.27 | 1.27 | 1.33 | 1.22 | 1.23 | 1.36 | 1.20 | 1.38 | 1.50 | 1.16 | 1.16 | 1.20 | 1.39 | 1.49 | 1.54          |      |      |      |
| JN860885 FSS13025        | Asian | 1.20 | 1.30 | 1.37 | 1.18 | 1.24 | 1.36 | 1.21 | 1.41 | 1.53 | 1.16 | 1.15 | 1.21 | 1.48 | 1.51 | 1.55          |      |      |      |
| Average                  |       | 1.25 | 1.31 | 1.40 | 1.20 | 1.25 | 1.37 | 1.20 | 1.39 | 1.51 | 1.19 | 1.18 | 1.25 | 1.39 | 1.45 | 1.49          |      |      |      |
| Standard deviation       |       | 0.07 | 0.07 | 0.07 | 0.01 | 0.01 | 0.02 | 0.01 | 0.01 | 0.02 | 0.02 | 0.02 | 0.04 | 0.04 | 0.03 | 0.05          |      |      |      |
| ZIKV Coding Sequences    | NS3   |      |      | NS4A |      |      | NS4B |      |      | NS5  |      |      | prM  |      |      | Average (ALL) |      |      |      |
| ZIKV Strains             | HS    | AG   | AB   | HS   | AG   | AB   | HS   | AG   | AB   | HS   | AG   | AB   | HS   | AG   | AB   | HS            | AG   | AB   |      |
| KF268948 ARB13565        | EA    | 1.13 | 1.36 | 1.49 | 1.36 | 1.38 | 1.50 | 1.23 | 1.32 | 1.43 | 1.04 | 1.15 | 1.24 | 1.30 | 1.28 | 1.39          | 1.24 | 1.32 | 1.43 |
| EU545988 FSM             | Asian | 1.12 | 1.35 | 1.48 | 1.41 | 1.38 | 1.47 | 1.17 | 1.25 | 1.31 | 1.04 | 1.17 | 1.24 | 1.24 | 1.40 | 1.49          | 1.23 | 1.32 | 1.41 |
| KU681082 CPC-0740        | Asian | 1.13 | 1.36 | 1.49 | 1.43 | 1.44 | 1.53 | 1.17 | 1.31 | 1.37 | 1.03 | 1.15 | 1.24 | 1.24 | 1.41 | 1.52          | 1.23 | 1.33 | 1.42 |
| KJ776791 H PF/2013       | Asian | 1.13 | 1.36 | 1.48 | 1.41 | 1.44 | 1.55 | 1.19 | 1.29 | 1.36 | 1.06 | 1.17 | 1.24 | 1.30 | 1.42 | 1.53          | 1.23 | 1.32 | 1.40 |
| KU681081 SV0127/14       | Asian | 1.13 | 1.36 | 1.49 | 1.40 | 1.39 | 1.47 | 1.18 | 1.27 | 1.32 | 1.04 | 1.16 | 1.24 | 1.27 | 1.40 | 1.50          | 1.22 | 1.31 | 1.40 |
| KU509998 Haiti/1225/2014 | Asian | 1.13 | 1.36 | 1.49 | 1.41 | 1.44 | 1.55 | 1.17 | 1.26 | 1.32 | 1.06 | 1.17 | 1.24 | 1.31 | 1.42 | 1.54          | 1.23 | 1.32 | 1.41 |
| KU365779 BeH819966       | Asian | 1.13 | 1.37 | 1.49 | 1.41 | 1.44 | 1.55 | 1.19 | 1.29 | 1.36 | 1.05 | 1.17 | 1.24 | 1.31 | 1.42 | 1.54          | 1.23 | 1.32 | 1.41 |
| KU497555 Brazil-ZKV2015  | Asian | 1.13 | 1.36 | 1.49 | 1.41 | 1.44 | 1.55 | 1.19 | 1.29 | 1.36 | 1.06 | 1.17 | 1.24 | 1.31 | 1.42 | 1.54          | 1.23 | 1.32 | 1.41 |
| KU647676 MRS OPY         | Asian | 1.13 | 1.36 | 1.49 | 1.41 | 1.44 | 1.55 | 1.19 | 1.30 | 1.37 | 1.06 | 1.17 | 1.25 | 1.32 | 1.43 | 1.54          | 1.23 | 1.32 | 1.41 |
| KU527068 Natal RGN       | Asian | 1.13 | 1.36 | 1.49 | 1.41 | 1.44 | 1.55 | 1.20 | 1.29 | 1.36 | 1.06 | 1.17 | 1.24 | 1.31 | 1.42 | 1.54          | 1.23 | 1.32 | 1.41 |
| KU707826 SSABR1          | Asian | 1.13 | 1.36 | 1.48 | 1.41 | 1.44 | 1.55 | 1.19 | 1.29 | 1.36 | 1.05 | 1.17 | 1.24 | 1.31 | 1.42 | 1.54          | 1.23 | 1.32 | 1.41 |
| KU501215 PRVABC59        | Asian | 1.13 | 1.37 | 1.50 | 1.42 | 1.44 | 1.54 | 1.19 | 1.30 | 1.36 | 1.06 | 1.17 | 1.25 | 1.32 | 1.42 | 1.53          | 1.23 | 1.32 | 1.41 |
| KU501216 103344          | Asian | 1.12 | 1.36 | 1.49 | 1.42 | 1.43 | 1.54 | 1.19 | 1.28 | 1.35 | 1.06 | 1.18 | 1.25 | 1.31 | 1.42 | 1.54          | 1.23 | 1.32 | 1.41 |
| KU501217 8375            | Asian | 1.13 | 1.37 | 1.50 | 1.42 | 1.43 | 1.54 | 1.20 | 1.28 | 1.35 | 1.06 | 1.18 | 1.25 | 1.31 | 1.42 | 1.54          | 1.23 | 1.32 | 1.41 |
| KU365780 BeH815744       | Asian | 1.13 | 1.36 | 1.48 | 1.41 | 1.44 | 1.55 | 1.19 | 1.29 | 1.36 | 1.06 | 1.17 | 1.24 | 1.32 | 1.44 | 1.55          | 1.23 | 1.32 | 1.41 |
| KU365778 BeH819015       | Asian | 1.13 | 1.35 | 1.48 | 1.42 | 1.44 | 1.54 | 1.19 | 1.29 | 1.35 | 1.05 | 1.17 | 1.24 | 1.31 | 1.42 | 1.54          | 1.23 | 1.32 | 1.41 |
| KU312312 Z1106033        | Asian | 1.12 | 1.36 | 1.49 | 1.41 | 1.43 | 1.54 | 1.19 | 1.29 | 1.35 | 1.06 | 1.17 | 1.25 | 1.34 | 1.44 | 1.55          | 1.23 | 1.32 | 1.41 |
| KU365777 BeH818995       | Asian | 1.13 | 1.36 | 1.49 | 1.41 | 1.44 | 1.55 | 1.19 | 1.29 | 1.36 | 1.06 | 1.17 | 1.24 | 1.32 | 1.44 | 1.55          | 1.23 | 1.32 | 1.41 |
| KU321639 ZikaSPH2015     | Asian | 1.12 | 1.34 | 1.46 | 1.41 | 1.44 | 1.55 | 1.17 | 1.26 | 1.32 | 1.06 | 1.17 | 1.24 | 1.31 | 1.42 | 1.54          | 1.23 | 1.32 | 1.41 |
| AY632535 MR 766          | EA    | 1.13 | 1.34 | 1.49 | 1.22 | 1.35 | 1.48 | 1.19 | 1.26 | 1.36 | 1.05 | 1.18 | 1.25 | 1.28 | 1.30 | 1.37          | 1.21 | 1.30 | 1.40 |
| KF268949 ARB15076        | EA    | 1.12 | 1.35 | 1.48 | 1.38 | 1.39 | 1.53 | 1.25 | 1.35 | 1.46 | 1.05 | 1.15 | 1.23 | 1.24 | 1.23 | 1.34          | 1.23 | 1.32 | 1.43 |
| KF268950 ARB7701         | EA    | 1.18 | 1.38 | 1.53 | 1.36 | 1.38 | 1.50 | 1.23 | 1.32 | 1.43 | 1.04 | 1.15 | 1.24 | 1.30 | 1.28 | 1.39          | 1.24 | 1.32 | 1.43 |
| HQ234501 ArD 41519       | WA    | 1.16 | 1.35 | 1.48 | 1.32 | 1.27 | 1.39 | 1.16 | 1.30 | 1.40 | 1.04 | 1.16 | 1.23 | 1.28 | 1.31 | 1.36          | 1.22 | 1.30 | 1.39 |
| HQ234500 IbH 30656       | WA    | 1.17 | 1.35 | 1.50 | 1.30 | 1.29 | 1.39 | 1.13 | 1.27 | 1.37 | 1.04 | 1.15 | 1.22 | 1.18 | 1.25 | 1.31          | 1.22 | 1.30 | 1.40 |
| KF993678 PLCal ZV        | Asian | 1.16 | 1.35 | 1.48 | 1.41 | 1.45 | 1.54 | 1.21 | 1.31 | 1.37 | 1.04 | 1.16 | 1.23 | 1.29 | 1.43 | 1.53          | 1.25 | 1.36 | 1.44 |
| HQ234499 P6-740          | Asian | 1.18 | 1.36 | 1.50 | 1.36 | 1.38 | 1.47 | 1.13 | 1.22 | 1.31 | 1.05 | 1.18 | 1.25 | 1.37 | 1.51 | 1.62          | 1.23 | 1.32 | 1.41 |
| JN860885 FSS13025        | Asian | 1.18 | 1.36 | 1.50 | 1.39 | 1.41 | 1.49 | 1.20 | 1.28 | 1.35 | 1.05 | 1.17 | 1.24 | 1.26 | 1.42 | 1.52          | 1.23 | 1.32 | 1.41 |
| Average                  |       | 1.14 | 1.36 | 1.49 | 1.39 | 1.41 | 1.52 | 1.19 | 1.29 | 1.36 | 1.05 | 1.17 | 1.24 | 1.30 | 1.39 | 1.50          | 1.23 | 1.32 | 1.41 |
| Standard deviation       |       | 0.02 | 0.01 | 0.01 | 0.05 | 0.05 | 0.05 | 0.03 | 0.03 | 0.04 | 0.01 | 0.01 | 0.01 | 0.04 | 0.07 | 0.08          | 0.01 | 0.01 | 0.01 |
| ZIKV Coding Sequences    | C     |      |      | E    |      |      | NS1  |      |      | NS2A |      |      | NS2B |      |      |               |      |      |      |
| ZIKV Strains (Asian)     | HS    | AG   | AB   | HS   | AG   | AB   | HS   | AG   | AB   | HS   | AG   | AB   | HS   | AG   | AB   |               |      |      |      |
| gb:EU545988              | 1.22  | 1.35 | 1.42 | 1.19 | 1.24 | 1.37 | 1.21 | 1.41 | 1.53 | 1.18 | 1.18 | 1.23 | 1.49 | 1.50 | 1.53 |               |      |      |      |
| gb:KU681082              | 1.22  | 1.32 | 1.40 | 1.18 | 1.25 | 1.37 | 1.22 | 1.43 | 1.54 | 1.18 | 1.17 | 1.24 | 1.46 | 1.47 | 1.52 |               |      |      |      |
| gb:KJ776791              | 1.20  | 1.27 | 1.35 | 1.19 | 1.24 | 1.36 | 1.20 | 1.39 | 1.51 | 1.21 | 1.16 | 1.21 | 1.40 | 1.44 | 1.45 |               |      |      |      |
| gb:KU681081              | 1.22  | 1.27 | 1.36 | 1.20 | 1.24 | 1.37 | 1.21 | 1.39 | 1.51 | 1.20 | 1.19 | 1.25 | 1.38 | 1.44 | 1.48 |               |      |      |      |
| gb:KU509998              | 1.22  | 1.29 | 1.38 | 1.20 | 1.25 | 1.37 | 1.20 | 1.39 | 1.50 | 1.19 | 1.18 | 1.24 | 1.40 | 1.44 | 1.45 |               |      |      |      |
| gb:KU365779              | 1.20  | 1.27 | 1.35 | 1.20 | 1.25 | 1.38 | 1.20 | 1.39 | 1.50 | 1.20 | 1.17 | 1.23 | 1.40 | 1.44 | 1.45 |               |      |      |      |
| gb:KU497555              | 1.20  | 1.27 | 1.34 | 1.20 | 1.26 | 1.39 | 1.20 | 1.39 | 1.51 | 1.20 | 1.18 | 1.23 | 1.39 | 1.43 | 1.44 |               |      |      |      |
| gb:KU647676              | 1.19  | 1.26 | 1.34 | 1.20 | 1.25 | 1.38 | 1.20 | 1.40 | 1.52 | 1.21 | 1.19 | 1.25 | 1.41 | 1.45 | 1.47 |               |      |      |      |
| gb:KU527068              | 1.22  | 1.29 | 1.38 | 1.20 | 1.25 | 1.37 | 1.19 | 1.39 | 1.50 | 1.20 |      |      |      |      |      |               |      |      |      |

|                       |  |      |      |      |  |      |      |      |  |      |      |      |  |      |      |      |  |      |      |      |  |               |      |      |  |  |
|-----------------------|--|------|------|------|--|------|------|------|--|------|------|------|--|------|------|------|--|------|------|------|--|---------------|------|------|--|--|
| gb:KJ776791           |  | 1.13 | 1.36 | 1.48 |  | 1.41 | 1.44 | 1.55 |  | 1.19 | 1.29 | 1.36 |  | 1.06 | 1.17 | 1.24 |  | 1.30 | 1.42 | 1.53 |  | 1.23          | 1.32 | 1.40 |  |  |
| gb:KU681081           |  | 1.13 | 1.36 | 1.49 |  | 1.40 | 1.39 | 1.47 |  | 1.18 | 1.27 | 1.32 |  | 1.04 | 1.16 | 1.24 |  | 1.27 | 1.40 | 1.50 |  | 1.22          | 1.31 | 1.40 |  |  |
| gb:KU509998           |  | 1.13 | 1.36 | 1.49 |  | 1.41 | 1.44 | 1.55 |  | 1.17 | 1.26 | 1.32 |  | 1.06 | 1.17 | 1.24 |  | 1.31 | 1.42 | 1.54 |  | 1.23          | 1.32 | 1.41 |  |  |
| gb:KU365779           |  | 1.13 | 1.37 | 1.49 |  | 1.41 | 1.44 | 1.55 |  | 1.19 | 1.29 | 1.36 |  | 1.05 | 1.17 | 1.24 |  | 1.31 | 1.42 | 1.54 |  | 1.23          | 1.32 | 1.41 |  |  |
| gb:KU497555           |  | 1.13 | 1.36 | 1.49 |  | 1.41 | 1.44 | 1.55 |  | 1.19 | 1.29 | 1.36 |  | 1.06 | 1.17 | 1.24 |  | 1.31 | 1.42 | 1.54 |  | 1.23          | 1.32 | 1.41 |  |  |
| gb:KU647676           |  | 1.13 | 1.36 | 1.49 |  | 1.41 | 1.44 | 1.55 |  | 1.19 | 1.30 | 1.37 |  | 1.06 | 1.17 | 1.25 |  | 1.32 | 1.43 | 1.54 |  | 1.23          | 1.32 | 1.41 |  |  |
| gb:KU527068           |  | 1.13 | 1.36 | 1.49 |  | 1.41 | 1.44 | 1.55 |  | 1.20 | 1.29 | 1.36 |  | 1.06 | 1.17 | 1.24 |  | 1.31 | 1.42 | 1.54 |  | 1.23          | 1.32 | 1.41 |  |  |
| gb:KU707826           |  | 1.13 | 1.36 | 1.48 |  | 1.41 | 1.44 | 1.55 |  | 1.19 | 1.29 | 1.36 |  | 1.05 | 1.17 | 1.24 |  | 1.31 | 1.42 | 1.54 |  | 1.23          | 1.32 | 1.41 |  |  |
| gb:KU501215           |  | 1.13 | 1.37 | 1.50 |  | 1.42 | 1.44 | 1.54 |  | 1.19 | 1.30 | 1.36 |  | 1.06 | 1.17 | 1.25 |  | 1.32 | 1.42 | 1.53 |  | 1.23          | 1.32 | 1.41 |  |  |
| gb:KU501216           |  | 1.12 | 1.36 | 1.49 |  | 1.42 | 1.43 | 1.54 |  | 1.19 | 1.28 | 1.35 |  | 1.06 | 1.18 | 1.25 |  | 1.31 | 1.42 | 1.54 |  | 1.23          | 1.32 | 1.41 |  |  |
| gb:KU501217           |  | 1.13 | 1.37 | 1.50 |  | 1.42 | 1.43 | 1.54 |  | 1.20 | 1.28 | 1.35 |  | 1.06 | 1.18 | 1.25 |  | 1.31 | 1.42 | 1.54 |  | 1.23          | 1.32 | 1.41 |  |  |
| gb:KU365780           |  | 1.13 | 1.36 | 1.48 |  | 1.41 | 1.44 | 1.55 |  | 1.19 | 1.29 | 1.36 |  | 1.06 | 1.17 | 1.24 |  | 1.32 | 1.44 | 1.55 |  | 1.23          | 1.32 | 1.41 |  |  |
| gb:KU365778           |  | 1.13 | 1.35 | 1.48 |  | 1.42 | 1.44 | 1.54 |  | 1.19 | 1.29 | 1.35 |  | 1.05 | 1.17 | 1.24 |  | 1.31 | 1.42 | 1.54 |  | 1.23          | 1.32 | 1.41 |  |  |
| gb:KU312312           |  | 1.12 | 1.36 | 1.49 |  | 1.41 | 1.43 | 1.54 |  | 1.19 | 1.29 | 1.35 |  | 1.06 | 1.17 | 1.25 |  | 1.34 | 1.44 | 1.55 |  | 1.23          | 1.32 | 1.41 |  |  |
| gb:KU365777           |  | 1.13 | 1.36 | 1.49 |  | 1.41 | 1.44 | 1.55 |  | 1.19 | 1.29 | 1.36 |  | 1.06 | 1.17 | 1.24 |  | 1.32 | 1.44 | 1.55 |  | 1.23          | 1.32 | 1.41 |  |  |
| gb:KU321639           |  | 1.12 | 1.34 | 1.46 |  | 1.41 | 1.44 | 1.55 |  | 1.17 | 1.26 | 1.32 |  | 1.06 | 1.17 | 1.24 |  | 1.31 | 1.42 | 1.54 |  | 1.23          | 1.32 | 1.41 |  |  |
| gb:KF993678           |  | 1.16 | 1.35 | 1.48 |  | 1.41 | 1.45 | 1.54 |  | 1.21 | 1.31 | 1.37 |  | 1.04 | 1.16 | 1.23 |  | 1.29 | 1.43 | 1.53 |  | 1.25          | 1.36 | 1.44 |  |  |
| gb:HQ234499           |  | 1.18 | 1.36 | 1.50 |  | 1.36 | 1.38 | 1.47 |  | 1.13 | 1.22 | 1.31 |  | 1.05 | 1.18 | 1.25 |  | 1.26 | 1.42 | 1.52 |  | 1.22          | 1.30 | 1.38 |  |  |
| gb:JN860885           |  | 1.18 | 1.36 | 1.50 |  | 1.39 | 1.41 | 1.49 |  | 1.20 | 1.28 | 1.35 |  | 1.05 | 1.17 | 1.24 |  | 1.26 | 1.42 | 1.52 |  | 1.23          | 1.32 | 1.41 |  |  |
| Average               |  | 1.13 | 1.36 | 1.49 |  | 1.41 | 1.43 | 1.53 |  | 1.19 | 1.28 | 1.35 |  | 1.05 | 1.17 | 1.24 |  | 1.30 | 1.42 | 1.53 |  | 1.23          | 1.32 | 1.41 |  |  |
| Standard deviation    |  | 0.02 | 0.01 | 0.01 |  | 0.01 | 0.02 | 0.03 |  | 0.02 | 0.02 | 0.02 |  | 0.01 | 0.01 | 0.01 |  | 0.03 | 0.01 | 0.01 |  | 0.01          | 0.01 | 0.01 |  |  |
| ZIKV Coding Sequences |  | C    |      |      |  | E    |      |      |  | NSI  |      |      |  | NS2A |      |      |  | NS2B |      |      |  |               |      |      |  |  |
| ZIKV Strains (EA)     |  | HS   | AG   | AB   |  | HS   | AG   | AB   |  | HS   | AG   | AB   |  | HS   | AG   | AB   |  | HS   | AG   | AB   |  |               |      |      |  |  |
| gb:KF268948           |  | 1.35 | 1.37 | 1.47 |  | 1.21 | 1.26 | 1.35 |  | 1.20 | 1.39 | 1.52 |  | 1.21 | 1.24 | 1.33 |  | 1.33 | 1.43 | 1.55 |  |               |      |      |  |  |
| gb:AY632535           |  | 1.30 | 1.34 | 1.45 |  | 1.16 | 1.21 | 1.29 |  | 1.20 | 1.37 | 1.52 |  | 1.24 | 1.24 | 1.34 |  | 1.30 | 1.38 | 1.49 |  |               |      |      |  |  |
| gb:KF268949           |  | 1.38 | 1.41 | 1.53 |  | 1.21 | 1.26 | 1.36 |  | 1.20 | 1.37 | 1.52 |  | 1.18 | 1.18 | 1.28 |  | 1.33 | 1.46 | 1.56 |  |               |      |      |  |  |
| gb:KF268950           |  | 1.35 | 1.37 | 1.47 |  | 1.21 | 1.26 | 1.35 |  | 1.20 | 1.39 | 1.52 |  | 1.21 | 1.24 | 1.33 |  | 1.33 | 1.43 | 1.55 |  |               |      |      |  |  |
| Average               |  | 1.34 | 1.37 | 1.48 |  | 1.20 | 1.25 | 1.34 |  | 1.20 | 1.38 | 1.52 |  | 1.21 | 1.23 | 1.32 |  | 1.32 | 1.42 | 1.54 |  |               |      |      |  |  |
| Standard deviation    |  | 0.03 | 0.02 | 0.03 |  | 0.02 | 0.02 | 0.03 |  | 0.00 | 0.01 | 0.00 |  | 0.02 | 0.02 | 0.03 |  | 0.01 | 0.03 | 0.03 |  |               |      |      |  |  |
| ZIKV Coding Sequences |  | NS3  |      |      |  | NS4A |      |      |  | NS4B |      |      |  | NS5  |      |      |  | prM  |      |      |  | Average (ALL) |      |      |  |  |
| ZIKV Strains (EA)     |  | HS   | AG   | AB   |  | HS   | AG   | AB   |  | HS   | AG   | AB   |  | HS   | AG   | AB   |  | HS   | AG   | AB   |  | HS            | AG   | AB   |  |  |
| gb:KF268948           |  | 1.13 | 1.36 | 1.49 |  | 1.36 | 1.38 | 1.50 |  | 1.23 | 1.32 | 1.43 |  | 1.04 | 1.15 | 1.24 |  | 1.30 | 1.28 | 1.39 |  | 1.24          | 1.32 | 1.43 |  |  |
| gb:AY632535           |  | 1.13 | 1.34 | 1.49 |  | 1.22 | 1.35 | 1.48 |  | 1.19 | 1.26 | 1.36 |  | 1.05 | 1.18 | 1.25 |  | 1.28 | 1.30 | 1.37 |  | 1.21          | 1.30 | 1.40 |  |  |
| gb:KF268949           |  | 1.12 | 1.35 | 1.48 |  | 1.38 | 1.39 | 1.53 |  | 1.25 | 1.35 | 1.46 |  | 1.05 | 1.15 | 1.23 |  | 1.24 | 1.23 | 1.34 |  | 1.23          | 1.32 | 1.43 |  |  |
| gb:KF268950           |  | 1.18 | 1.38 | 1.53 |  | 1.36 | 1.38 | 1.50 |  | 1.23 | 1.32 | 1.43 |  | 1.04 | 1.15 | 1.24 |  | 1.30 | 1.28 | 1.39 |  | 1.24          | 1.32 | 1.43 |  |  |
| Average               |  | 1.14 | 1.36 | 1.50 |  | 1.33 | 1.37 | 1.50 |  | 1.23 | 1.31 | 1.42 |  | 1.04 | 1.16 | 1.24 |  | 1.28 | 1.27 | 1.37 |  | 1.23          | 1.31 | 1.42 |  |  |
| Standard deviation    |  | 0.02 | 0.01 | 0.02 |  | 0.07 | 0.02 | 0.02 |  | 0.02 | 0.03 | 0.04 |  | 0.00 | 0.01 | 0.01 |  | 0.02 | 0.02 | 0.02 |  | 0.01          | 0.01 | 0.01 |  |  |
| ZIKV Coding Sequences |  | C    |      |      |  | E    |      |      |  | NSI  |      |      |  | NS2A |      |      |  | NS2B |      |      |  |               |      |      |  |  |
| ZIKV Strains (WA)     |  | HS   | AG   | AB   |  | HS   | AG   | AB   |  | HS   | AG   | AB   |  | HS   | AG   | AB   |  | HS   | AG   | AB   |  |               |      |      |  |  |
| gb:HQ234501           |  | 1.31 | 1.35 | 1.41 |  | 1.23 | 1.29 | 1.39 |  | 1.22 | 1.39 | 1.48 |  | 1.14 | 1.16 | 1.24 |  | 1.37 | 1.45 | 1.55 |  |               |      |      |  |  |
| gb:HQ234500           |  | 1.37 | 1.38 | 1.44 |  | 1.23 | 1.27 | 1.38 |  | 1.18 | 1.36 | 1.46 |  | 1.18 | 1.19 | 1.28 |  | 1.40 | 1.50 | 1.61 |  |               |      |      |  |  |
| Average               |  | 1.34 | 1.36 | 1.42 |  | 1.23 | 1.28 | 1.39 |  | 1.20 | 1.37 | 1.47 |  | 1.16 | 1.17 | 1.26 |  | 1.38 | 1.48 | 1.58 |  |               |      |      |  |  |
| Standard deviation    |  | 0.03 | 0.02 | 0.02 |  | 0.00 | 0.01 | 0.01 |  | 0.02 | 0.01 | 0.01 |  | 0.02 | 0.01 | 0.02 |  | 0.01 | 0.03 | 0.03 |  |               |      |      |  |  |
| ZIKV Coding Sequences |  | NS3  |      |      |  | NS4A |      |      |  | NS4B |      |      |  | NS5  |      |      |  | prM  |      |      |  | Average (ALL) |      |      |  |  |
| ZIKV Strains (WA)     |  | HS   | AG   | AB   |  | HS   | AG   | AB   |  | HS   | AG   | AB   |  | HS   | AG   | AB   |  | HS   | AG   | AB   |  | HS            | AG   | AB   |  |  |
| gb:HQ234501           |  | 1.16 | 1.35 | 1.48 |  | 1.32 | 1.27 | 1.39 |  | 1.16 | 1.30 | 1.40 |  | 1.04 | 1.16 | 1.23 |  | 1.28 | 1.31 | 1.36 |  | 1.22          | 1.30 | 1.39 |  |  |
| gb:HQ234500           |  | 1.17 | 1.35 | 1.50 |  | 1.30 | 1.29 | 1.39 |  | 1.13 | 1.27 | 1.37 |  | 1.04 | 1.15 | 1.22 |  | 1.18 | 1.25 | 1.31 |  | 1.22          | 1.30 | 1.40 |  |  |
| Average               |  | 1.16 | 1.35 | 1.49 |  | 1.31 | 1.28 | 1.39 |  | 1.14 | 1.28 | 1.38 |  | 1.04 | 1.15 | 1.23 |  | 1.23 | 1.28 | 1.33 |  | 1.22          | 1.30 | 1.39 |  |  |
| Standard deviation    |  | 0.01 | 0.00 | 0.01 |  | 0.01 | 0.01 | 0.00 |  | 0.02 | 0.02 | 0.02 |  | 0.00 | 0.00 | 0.01 |  | 0.05 | 0.03 | 0.02 |  | 0.00          | 0.00 | 0.00 |  |  |

EA: East African. WA: West African. HS: Homo sapiens. AG: Aedes aegypti. AB: Aedes albopictus
